# Supplementary material for: Role of Estradiol Hormone in Human Life and Electrochemical Aptasensing of 17β-Estradiol: A Review
Source: MDPI journal article supplement (doi:10.3390/bios12121117), 2022-12-02
Supplement: s1 [file s1]

Supporting Information

# Role of Estradiol Hormone in Human Life and Electrochemical Aptasensing of 17 $\beta$ -Estradiol: A Review

P. P. Waifalkar <sup>1,2</sup>, Daegwon Noh <sup>1,2</sup>, Poorva Derashri <sup>3</sup>, Sagar Barage <sup>3,4</sup> and Eunsoon Oh <sup>1,2,\*</sup>

<sup>1</sup> Department of Physics, Chungnam National University, Daejeon 34134, Republic of Korea

<sup>2</sup> Institute of Quantum Table 34134, Republic of Korea

<sup>3</sup> Amity Institute of Biotechnology, Amity University, Maharashtra, Mumbai-Pune Expressway, Panvel, Maharashtra 410206, India

<sup>4</sup> Centre for Computational Biology and Translational Research, Amity University, Maharashtra, Mumbai-Pune Expressway, Panvel, Maharashtra 410206, India

\* Correspondence: esoh@cnu.ac.kr; Tel.: +82-10-6349-5453

**Table S1.** Electrode materials, aptamer sequences, selectivity in different matrix and environmental sample measurements.

| Electrode              | Estradiol Specific Aptamer Sequence                                                         | Selectivity in a Matrix<br>(Interference Effects<br>from Various<br>Materials) | Environmental<br>Sample<br>Measurements | References              |
|------------------------|---------------------------------------------------------------------------------------------|--------------------------------------------------------------------------------|-----------------------------------------|-------------------------|
| Au/streptavidin/biotin | 5'-Biotin-GCTTCCAGCTTATTGAATTACACGCAGAGG-GTAGCGGCTCTGCGCATTCAATTGCTGCGCGCTGAAG-CGCGGAAGC-3' | 2-methoxynaphthalene, 1-aminoanthraquinone                                     | N/A                                     | (Kim et al., 2007) [34] |

| Electrode                   | Estradiol Specific Aptamer Sequence                                                                                                                                 | Selectivity in a Matrix<br>(Interference Effects<br>from Various<br>Materials)           | Environmental<br>Sample<br>Measurements | References                       |
|-----------------------------|---------------------------------------------------------------------------------------------------------------------------------------------------------------------|------------------------------------------------------------------------------------------|-----------------------------------------|----------------------------------|
| PEDOT/AuNP<br>/streptavidin | 5'-Biotin-<br>GCTTCCAGCTTATTGAATTACACGCAGAGGGTAGCGGCTCT<br>GCGC ATTCAATTGCTGCGCGCTGAAGCGCGGAAGC-3'                                                                  | 17 $\alpha$ -ethynlestradiol,<br>estrone, naphthalene                                    | N/A                                     | (Olowu et<br>al., 2010)<br>[46]  |
| Au                          | 5'-SH-<br>GCTTCCAGCTTATTGAATTACACGCAGAGGGTAGCGGCTCT<br>GCGCATTCAATTGCTGCGCGCTGAAGCGCG GAAGC-3'                                                                      | 2-methoxynaphthalene,<br>1-aminoanthraquinone                                            | Urine                                   | (Lin et al.,<br>2012) [37]       |
| GCE/VS2/Au                  | 5'-SH-(CH <sub>2</sub> ) <sub>6</sub> -TTT TTT TTT T GCT TCC AGC TTA TTG AAT TAC<br>ACG CAG AGG GTA GCG GCT CTG CGC ATT CAA TTG CTG<br>CGC GCT GAA GCG CGG AAG C-3' | Naphthalene, 1-<br>aminoanthraquinone                                                    | Urine                                   | (Huang et<br>al., 2014a)<br>[50] |
| BDD/Au                      | 5'-<br>SHGCTTCCAGCTTATTGAATTACACGCAGAGGGTAGCGGCT<br>CT- GCGCATTCAATTGCTGCGCGCTGAAGCGCGGAAGC-3'                                                                      | Estriol, bisphenol A,<br>nonyl phenol, diethyl<br>phthalate, resorcinol,<br>and atrazine | Wastewater                              | (Ke et al.,<br>2014) [36]        |
| GCE/WS2 /Au                 | 5'-SH-(CH <sub>2</sub> ) <sub>6</sub> -TTT TTT TTT T GCT TCC AGC TTA TTG AAT TAC<br>ACG CAG AGG GTA GCG GCT CTG CGC ATT CAA TTG CTG<br>CGC GCT GAA GCG CGG AAG C-3' | Naphthalene, 1-<br>aminoanthraquinone                                                    | Serum and<br>Water                      | (Huang et<br>al., 2014)<br>[51]  |
| GCE/CuS/Au/<br>GO/Au        | 5'-SH-(CH <sub>2</sub> ) <sub>6</sub> -TTT TTT TTT T GCT TCC AGC TTA TTG AAT TAC<br>ACG CAG AGG GTA GCG GCT CTG CGC ATT CAATTG CTG<br>CGC GCT GAA GCG CGG AAG C-3'  | Bisphenol A, 1-<br>aminoanthraquinone<br>and naphthalene                                 | Urine                                   | (Huang et<br>al., 2015a)<br>[52] |

| Electrode               | Estradiol Specific Aptamer Sequence                                                                                                                                                                                                                          | Selectivity in a Matrix<br>(Interference Effects<br>from Various<br>Materials)                                                                 | Environmental<br>Sample<br>Measurements | References                       |
|-------------------------|--------------------------------------------------------------------------------------------------------------------------------------------------------------------------------------------------------------------------------------------------------------|------------------------------------------------------------------------------------------------------------------------------------------------|-----------------------------------------|----------------------------------|
| GCE/AuNp/<br>CoS        | 5'-SH-(CH <sub>2</sub> ) <sub>6</sub> -TTT TTT TTT T GCT TCC AGC TTA TTG AAT TAC<br>ACG CAG AGG GTA GCG GCT CTG CGC ATT CAA TTG CTG<br>CGC GCT GAA GCG CGG AAG C-3'                                                                                          | 1-aminoanthraquinone,<br>naphthalene,<br>polychlorinated<br>biphenyl, bisphenol A,<br>phthalic acid ester,<br>testosterone, and<br>cholesterol | Urine                                   | (Huang et<br>al., 2015b)<br>[42] |
|                         | cDNA: 5'-GGA GGA GGA GGA GGA GGA GGA GGA GGA GGA<br>GGA GGA GGA G G CTT CCG CGC TTC AGC GCG CAG CAA-3'                                                                                                                                                       |                                                                                                                                                |                                         |                                  |
| Au/NiHCF/Au             | 5'-SH-(CH <sub>2</sub> ) <sub>6</sub> -GCT-TCC-AGC-TTA-TTG-AAT-TAC-ACG-CAG-<br>AGG-GTA-GCG-GCT-CTG-CGC-ATT-CAA-TTG-CTG-CGC-GCT-<br>GAA-GCG-CGG-AAG-C-3' ;<br>Random DNA sequence: 5'-(SH)-(CH <sub>2</sub> ) <sub>6</sub> -CTG-ACA-CCA-TAT-<br>TAT-GAA-GA-3' | Ethinylestradiol,<br>bisphenol A, estriol,<br>polychlorinated<br>biphenyl (PCB 101),<br>diethyl phthalate, 4-<br>nonyl phenol, and<br>atrazine | Municipal<br>wastewater                 | (Fan et al.,<br>2015) [48]       |
| GCE/poly(Py-<br>co-PAA) | 75-mer E2 aptamer:<br>NH <sub>2</sub> (CH <sub>2</sub> ) <sub>6</sub> -<br>ATACGAGCTTGTTC AATACGAAGGGATGCCGTTTGGGCCCA<br>AGTTCGGCATAGTGTGGTGATAGTAAGAGCAATC                                                                                                  | Bisphenol-A,<br>progesterone                                                                                                                   | Urine and tap<br>water                  | (Zhu et al.,<br>2015) [39]       |
|                         | 35-mer E2 aptamer:<br>NH <sub>2</sub> (CH <sub>2</sub> ) <sub>6</sub> -<br>AAGGGATGCCGTTTGGGCCCAAGTTCGGCATAGTG                                                                                                                                               |                                                                                                                                                |                                         |                                  |
|                         | Adenosine aptamer:<br>NH <sub>2</sub> (CH <sub>2</sub> ) <sub>6</sub> -ACCTGGGGGAGTATTGCGGAGGAAGGT                                                                                                                                                           |                                                                                                                                                |                                         |                                  |

| Electrode                                      | Estradiol Specific Aptamer Sequence                                                                                                                                    | Selectivity in a Matrix<br>(Interference Effects<br>from Various<br>Materials)                                          | Environmental<br>Sample<br>Measurements       | References                     |
|------------------------------------------------|------------------------------------------------------------------------------------------------------------------------------------------------------------------------|-------------------------------------------------------------------------------------------------------------------------|-----------------------------------------------|--------------------------------|
|                                                | Non-specific ssDNA as control in urine detection:<br>NH <sub>2</sub> (CH <sub>2</sub> ) <sub>6</sub> -<br>AGGTATTGATCCGCCCGGCTAGCATTTTGTGGTCTCCAGGGG<br>TACTCCCC       |                                                                                                                         |                                               |                                |
| GCE/ERGO                                       | 38-mer amine-functionalized ssDNA (NH <sub>2</sub> -APT)                                                                                                               | Estrogen and<br>testosterone                                                                                            | Wastewater<br>and<br>pharmaceutical<br>sample | (Rather et al., 2018)<br>[13]  |
| Au/MCH/<br>Graphene                            | 5'-<br>GCTTCCAGCTTATTGAATTACACGCAGAGGGTAGCGGCTCT<br>GCGCAT TCAATTGCTGCGCGCTGAAGCGCGGAAGC-3'                                                                            | Estriol, bisphenol A,<br>nolyl phenol,<br>polychlorinated<br>biphenyl and atrazine                                      | Tap water                                     | (Liu et al., 2019) [44]        |
| Screen printed<br>gold electrode               | 5'-Thiol-<br>TTTTTTTTTTTTTTTGCTTCCAGCTTATTGAATTACACGCAGAG<br>GGTA-3' (split1);<br>5'-<br>GCGGCTCTGCGCATTCAATTGCTGCGCGCTGAAGCGCGGAA<br>GCTTTTTTTTTTTT-Thiol-3' (split2) | Estriol, progesterone,<br>dibutyl phthalate,<br>bovine serum albumin,<br>testosterone, atrazine,<br>and bisphenol A     | Tap water and<br>milk                         | (Nameghi et al., 2019)<br>[49] |
| Carbon/NH <sub>2</sub> -<br>SWCNT/NMB<br>/AuNP | 5'-SH-(CH <sub>2</sub> ) <sub>6</sub> -GCT-TCC-AGC-TTA-TTG-AAT-TAC-ACG-CAG-<br>AGG-GTA-GCG-GCT-CTG-CGC- ATT-CAA-TTG-CTG-CGC-GCT-<br>GAA-GCG-CGGAAG-C-3'                | Follicle-stimulating<br>hormone, luteinizing<br>hormone, glutamic<br>acid, ascorbic acid, uric<br>acid, neuron-specific | Serum                                         | (Ming et al., 2019)<br>[54]    |

| Electrode                                                                          | Estradiol Specific Aptamer Sequence                                                                                                                                                                                                                                                                                | Selectivity in a Matrix<br>(Interference Effects<br>from Various<br>Materials)                                                     | Environmental<br>Sample<br>Measurements | References                         |
|------------------------------------------------------------------------------------|--------------------------------------------------------------------------------------------------------------------------------------------------------------------------------------------------------------------------------------------------------------------------------------------------------------------|------------------------------------------------------------------------------------------------------------------------------------|-----------------------------------------|------------------------------------|
|                                                                                    |                                                                                                                                                                                                                                                                                                                    | enolase, or<br>carcinoembryonic<br>antigen                                                                                         |                                         |                                    |
| AuNP/thionine/MCNTs                                                                | 5'-SH-(CH <sub>2</sub> ) <sub>6</sub> -GCTTCCAG CTTATTGAATTACACGCAGAGGGTA<br>GCGGCTCTGCGCATTCAATTGCTGCGCGCTGAAGCGCGGAA<br>GC- 3'                                                                                                                                                                                   | Ascorbic acid,<br>dopamine, uric acid, L-<br>lysine, L-cysteine, L-<br>tyrosine, hypoxanthine,<br>progesterone, and<br>cholesterol | Serum                                   | (Liu et al.,<br>2019) [55]         |
| Screen-printed<br>carbon<br>electrode/Carbon<br>nanodot                            | NH <sub>2</sub> -5'-GCTTCCAGCTTATTGAATTACACGCAGAGGGTA<br>GCGGCTCTGCGCATTCAATTGCT GCGCGCTGAAGCGCG<br>GAAGC-3'                                                                                                                                                                                                       | Estriol, progesterone,<br>and bisphenol A                                                                                          | River water                             | (Mat Zaid<br>et al., 2020)<br>[40] |
| GCE and<br>laser-scribed<br>graphene<br>/poly(β-<br>CD)/AF1-<br>ADA/ON1/AF<br>2-Au | The sequence of 5'-amine modified AF 1 was 5'-NH <sub>2</sub> -AAG GGA<br>TGC CGT TTG GG-3'; the 3' - thiol modified AF2 sequence was 5'-<br>CCC AAG TTC GGC ATA GTG-SH-3'; the ON 1 was 5'-AAG CTT<br>GGG CCA TGC CCA GGA AGG ACC CAA ACG G-3' and ON 2 :5'-<br>CCG TTT GGG TCC TTC CTG GGC ATG GCC CAA GCT T-3'. | Glucose, bisphenol A,<br>progesterone, and<br>bovine serum albumin                                                                 | Milk                                    | (Chang et<br>al., 2021)<br>[43]    |

| Electrode                                       | Estradiol Specific Aptamer Sequence                                                                                                            | Selectivity in a Matrix<br>(Interference Effects<br>from Various<br>Materials) | Environmental<br>Sample<br>Measurements | References               |
|-------------------------------------------------|------------------------------------------------------------------------------------------------------------------------------------------------|--------------------------------------------------------------------------------|-----------------------------------------|--------------------------|
| SPCE/poly(pyrrole-co-pyrrole-3-carboxylic acid) | NH <sub>2</sub> -5'-ATA CGA GCT TGT TCA ATA CGA AGG GAT GCC GTT TGG GCC CAA GTT CGG CAT AGT GTG GTG ATA GTA AGA GCA ATC-3'                     | N/A                                                                            | N/A                                     | (Rozi et al., 2021) [53] |
| PEDOT-GO/Au@Pt/Apt/MCH/GCE                      | 5-SH-(CH <sub>2</sub> ) <sub>6</sub> -GCT-TCC-AGC-TTA-TTG-AAT-TAC-ACG-CAG-AGG-GTA-GCG-GCT-CTG-CGC-ATT-CAA-TTG-CTG-CGC-GCT-GAA-GCG-CGG-AAG-C-3' | Bisphenol A, estrone, estriol, and ethinylestradiol                            | Serum                                   | (Zhao et al., 2022) [76] |

## References

13. Rather, J.A.; Khudaish, E.A.; Kannan, P. Graphene-Amplified Femtosensitive Aptasensing of Estradiol, an Endocrine Disruptor. *Analyst* **2018**, *143*, 1835–1845. <https://doi.org/10.1039/C7AN02092A>.
35. Kim, Y.S.; Jung, H.S.; Matsuura, T.; Lee, H.Y.; Kawai, T.; Gu, M.B. Electrochemical Detection of 17 $\beta$ -Estradiol Using DNA Aptamer Immobilized Gold Electrode Chip. *Biosens. Bioelectron.* **2007**, *22*, 2525–2531. <https://doi.org/10.1016/j.bios.2006.10.004>.
37. Ke, H.; Liu, M.; Zhuang, L.; Li, Z.; Fan, L.; Zhao, G. A Femtomolar Level 17 $\beta$ -Estradiol Electrochemical Aptasensor Constructed On Hierarchical Dendritic Gold Modified Boron-Doped Diamond Electrode. *Electrochim. Acta* **2014**, *137*, 146–153. <https://doi.org/10.1016/j.electacta.2014.06.014>.
38. Lin, Z.; Chen, L.; Zhang, G.; Liu, Q.; Qiu, B.; Cai, Z.; Chen, G. Label-Free Aptamer-Based Electrochemical Impedance Biosensor for 17 $\beta$ -Estradiol. *Analyst* **2012**, *137*, 819–822. <https://doi.org/10.1039/C1AN15856B>.
39. Zhu, B.; Alsager, O.A.; Kumar, S.; Hodgkiss, J.M.; Travas-Sejdic, J. Label-Free Electrochemical Aptasensor for Femtomolar Detection of 17 $\beta$ -Estradiol. *Biosens. Bioelectron.* **2015**, *70*, 398–403. <https://doi.org/10.1016/j.bios.2015.03.050>.
40. Mat Zaid, M.H.; Abdullah, J.; Rozi, N.; Mohamad Rozlan, A.A.; Abu Hanifah, S. A Sensitive Impedimetric Aptasensor Based on Carbon Nanodots Modified Electrode for Detection of 17 $\beta$ -Estradiol. *Nanomaterials* **2020**, *10*, 1346. <https://doi.org/10.3390/nano10071346>.
42. Huang, K.-J.; Liu, Y.-J.; Zhang, J.-Z.; Cao, J.-T.; Liu, Y.-M. Aptamer/Au Nanoparticles/Cobalt Sulfide Nanosheets Biosensor for 17 $\beta$ -Estradiol Detection Using a Guanine-Rich Complementary DNA Sequence for Signal Amplification. *Biosens. Bioelectron.* **2015**, *67*, 184–191. <https://doi.org/10.1016/j.bios.2014.08.010>.
43. Chang, Z.; Zhu, B.; Liu, J.; Zhu, X.; Xu, M.; Travas-Sejdic, J. Electrochemical Aptasensor for 17 $\beta$ -Estradiol Using Disposable Laser Scribed Graphene Electrodes. *Biosens. Bioelectron.* **2021**, *185*, 113247. <https://doi.org/10.1016/j.bios.2021.113247>.
47. Olowu, R.A.; Arotiba, O.; Mailu, S.N.; Waryo, T.T.; Baker, P.; Iwuoha, E. Electrochemical Aptasensor for Endocrine Disrupting 17 $\beta$ -Estradiol Based on a Poly(3,4-Ethylenedioxythiophene)-Gold Nanocomposite Platform. *Sensors* **2010**, *10*, 9872–9890. <https://doi.org/10.3390/s101109872>.

- 
48. Fan, L.; Zhao, G.; Shi, H.; Liu, M. A Simple and Label-Free Aptasensor Based on Nickel Hexacyanoferrate Nanoparticles as Signal Probe for Highly Sensitive Detection of 17 $\beta$ -Estradiol. *Biosens. Bioelectron.* **2015**, *68*, 303–309. <https://doi.org/10.1016/j.bios.2015.01.015>.
49. Nameghi, M.A.; Danesh, N.M.; Ramezani, M.; Alibolandi, M.; Abnous, K.; Taghdisi, S.M. An Ultrasensitive Electrochemical Sensor for 17 $\beta$ -Estradiol Using Split Aptamers. *Anal. Chim. Acta* **2019**, *1065*, 107–112. <https://doi.org/10.1016/j.aca.2019.02.062>.
50. Huang, K.-J.; Liu, Y.-J.; Shi, G.-W.; Yang, X.-R.; Liu, Y.-M. Label-Free Aptamer Sensor for 17 $\beta$ -Estradiol Based on Vanadium Disulfide Nanoflowers and Au Nanoparticles. *Sens. Actuators B Chem.* **2014**, *201*, 579–585. <https://doi.org/10.1016/j.snb.2014.05.055>.
51. Huang, K.-J.; Liu, Y.-J.; Zhang, J.-Z.; Liu, Y.-M. A Novel Aptamer Sensor Based on Layered Tungsten Disulfide Nanosheets and Au Nanoparticles Amplification for 17 $\beta$ -Estradiol Detection. *Anal. Methods* **2014**, *6*, 8011–8017. <https://doi.org/10.1039/C4AY01478B>.
52. Huang, K.-J.; Liu, Y.-J.; Zhang, J.-Z. Aptamer-Based Electrochemical Assay of 17 $\beta$ -Estradiol Using a Glassy Carbon Electrode Modified with Copper Sulfide Nanosheets and Gold Nanoparticles, and Applying Enzyme-Based Signal Amplification. *Microchim. Acta* **2015**, *182*, 409–417. <https://doi.org/10.1007/s00604-014-1352-0>.
53. Rozi, N.; Hanifah, S.A.; Zaid, M.H.M.; Abd Karim, N.H.; Ikeda, M. Feasible Study on Poly(Pyrrole-Co-Pyrrole-3-Carboxylic Acid)-Modified Electrode for Detection of 17 $\beta$ -Estradiol. *Chem. Pap.* **2021**, *75*, 3493–3503. <https://doi.org/10.1007/s11696-021-01597-9>.
54. Ming, T.; Wang, Y.; Luo, J.; Liu, J.; Sun, S.; Xing, Y.; Xiao, G.; Jin, H.; Cai, X. Folding Paper-Based Aptasensor Platform Coated with Novel Nanoassemblies for Instant and Highly Sensitive Detection of 17 $\beta$ -Estradiol. *ACS Sens.* **2019**, *4*, 3186–3194. <https://doi.org/10.1021/acssensors.9b01633>.
55. Liu, X.; Deng, K.; Wang, H.; Li, C.; Zhang, S.; Huang, H. Aptamer Based Ratiometric Electrochemical Sensing of 17 $\beta$ -Estradiol Using an Electrode Modified with Gold Nanoparticles, Thionine, and Multiwalled Carbon Nanotubes. *Microchim. Acta* **2019**, *186*, 347. <https://doi.org/10.1007/s00604-019-3465-y>.
76. Zhao, Z.; Chen, H.; Cheng, Y.; Huang, Z.; Wei, X.; Feng, J.; Cheng, J.; Mugo, S.M.; Jaffrezic-Renault, N.; Guo, Z. Electrochemical Aptasensor Based on Electrodeposited Poly(3,4-Ethylenedioxythiophene)-Graphene Oxide Coupled with Au@Pt Nanocrystals for the Detection of 17 $\beta$ -Estradiol. *Microchim. Acta* **2022**, *189*, 178. <https://doi.org/10.1007/s00604-022-05274-w>.
